# Supplementary material
Source: PubMed Central journal article supplement (PMC4091553)
Supplement: psb-8-e27034-s01.pdf [file psb-8-e27034-s01.pdf]

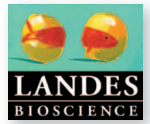

## **Supplemental Material to:**

**Michelle Price and Sakiko Okumoto\***

**Inter-subunit interactions between Glutamate-Like  
Receptors in Arabidopsis**

**Plant Signaling & Behavior 2013; 8(11)**

**<http://dx.doi.org/10.4161/psb.27034>**

**[www.landesbioscience.com/journals/psb/article/27034](http://www.landesbioscience.com/journals/psb/article/27034)**

CFP

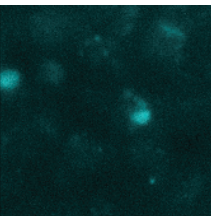

YFP

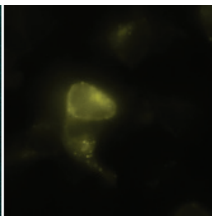

Overlay

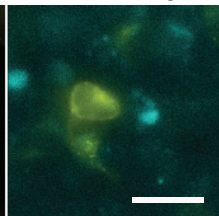



**Supplemental Table 2. Primers used for amplification of Arabidopsis glutamate receptor genes.**

| <b>GLR</b> | <b>AGI NUMBER</b> | <b>FORWARD PRIMER</b>     | <b>REVERSE PRIMER</b>    |
|------------|-------------------|---------------------------|--------------------------|
| <b>1.4</b> | <b>AT3G07520</b>  | ATGGAGAATTGTATGATTCGCAAC  | GATGACTGAATTCTCATTTGCCT  |
| <b>2.1</b> | <b>AT5G27100</b>  | ATGAAGAGAGAAAACAACCTCGTT  | ATTGCCATTGTTTACTGCGTTT   |
| <b>2.7</b> | <b>AT2G29120</b>  | ATGAAAGTGATGAACCCTAGAAAAA | TTCACCTCACATTGAATTATAGCA |
| <b>3.1</b> | <b>AT2G17260</b>  | ATGTCATTTCCACGTTTTCT      | TATGGGTCTTCTAGATGCAGTCCT |
| <b>3.6</b> | <b>AT3G51480</b>  | GAGAAGATGAAGTGTTTCTGCTT   | GTTGCAGCGACTTGAACCAT     |
